# Supplementary material for: Extracellular matrix retention of thrombospondin 1 is controlled by its conserved C-terminal region
Source: Oxford University Press journal article supplement (doi:10.1242/jcs.021006), 2008-02-20
Supplement: jcs021006-sup-021006-tables1.pdf [file jcs021006-sup-021006-tables1.pdf]

**Table S1. Oligonucleotide primers used in this study (sequence 5'-3').**

## Secreted mRFP monomer

465F GTACGCTAGCTATGGCCTCCTCCGAGGACGTCATC  
473R GTACCTCGAGTTAGGCGCCGGTGGAGTG

## Secreted mRFP trimer

474R GTACCTCGAGTTAAGGCCGCTCAGCTCATT

## No

317F CCTGCTGGGCACCAACAG  
318R GATCGTTAACGGGCGCTCAGCTCATTG

## VWF\_C

515F GTACGTTAACCCCTATGCTATCACAACGGA  
115R GTACCTCGAGGCGTCTCAGGCACCCGGT

## TSR

516R GTACCTCGAGTTAAATTGGACAGTCCTGCTTGTTGCA

## C-term from E1 to C

445F GTACGTTAACATTGATGGATGCCTGTCCAAT  
446R GTACCTCGAGTTAGGGATCTCTACATTGTA

## O domain

461F GTACAAGCTTATTGGCCACAAGACAAAAG  
325R GATCGTTAACGGGCGCCTCAGCTCATT

## VGD MUTANT

475F GGCGATGGTGTAGGTGATGCCTGCAAAG  
476R CTTTGCAGGCATCACCTACCCATCGCC

## AAA MUTANT

455F TTCATCAACACCGAAAGGGCCGCTGCCTATGCTGGATT  
456R AAATCCAGCATAGGCAGCGGCCCTTTCGGTGTTGATGAA

## Ciona TSP-A

243F TCTGTGACTTCTGACGCG  
244R CGTGTCTTTACACATGTA

## COMP/TSP-5

510F CCCGCCACCGCCATGGTC  
511R GGCTTGCCGAGCTGATG
